# Supplementary material
Source: PubMed Central journal article supplement (PMC14566)
Supplement: pnas_250216797_3.pdf [file pnas_250216797_3.pdf]

Position nr:

11111111111111111111111111111111111111

111

11122233555555667777899902222223444444555555556666777  
347236039471235680102474013123678932456789012345683789023

16777455  
31024200

|                  |                                                             |                    |
|------------------|-------------------------------------------------------------|--------------------|
| kangaroo         | ITHRASSFEYLSLFTVEGIKVFVLDLDFSSNQASILASPKIHSNMDASHSDSRPTLASS | AIKVFSMM           |
| opossum          | .....R.Y.....Y.....ES.....                                  | ..R.Y...           |
| tamandua         | V...P.....AD..R.L.....NTA.SAL...L--V.P..GET..SS...          | ... <b>F</b> ..V   |
| 3-toed sloth     | V.Q..P...S.....AD.....G.NTA.SAL.....-V.P...EP..SS...        | .....V             |
| Afr. elephant    | V...P.....D..Q.L.Q..N...SAL.C..Q.G.....EA..SS...            | <b>Q.L.C</b> ..    |
| manatee          | V...HN.....D..QLL.....N..KSAL.C..VQ.G.....EA.ASS.N.         | <b>QLLC</b> ..     |
| hyrax            | V...P.....D..QLL.....N..SAL.C..VQ.G.....EA..SS...           | <b>QLLC</b> ..     |
| aardvark         | V...P.....D..QLL.E...N...SAL.C..VQ.S..DG..EA..SSV..         | <b>QLLC</b> ..     |
| elephant shrew   | xxxx.P.xxxx....D..QLL.....N...SAL.CxxVQ.G.....EA..SS...     | x. <b>QLLC</b> ..  |
| mole rat         | V..H.P..Q..T.L..DC.....E.N.S.SAL...VQ.GL..G..EAQ.SS.LF      | .....L.            |
| guinea pig       | V...P.....D.....QE.N...SAL...VQ.GL..G..EA..SS...            | .....L.            |
| pika             | V...P.....D.....QE.....SAL...VQ.GL..G..EA..SS...            | .....L.            |
| rabbit           | V...TP.....D.....QE.N...SAL...VQ.GL..G..EA..SSV..           | T.....L.           |
| galago           | V...PP.....D.V.....QE.N...SALV...VQ.GL..G..EA..SS...        | .V...L.            |
| human            | V...TP.....D.....Q..N...SAL.C..QTGL..T.AEA...S...           | T.... <b>CL</b> .. |
| tree shrew       | V...P.....D.....E.N...SAL...VQ.GL..G..EA..SS...             | .....L.            |
| hedgehog         | V...P.L.....D.....E..PS..AL...VA.GL..GP.EA..SSV..           | .....L.            |
| fruit-eating bat | ...P.....D.....QE.N...SAL...LQ.GV.GG..EA..SS...             | .....V             |
| flying fox       | .A...P.....D.....QE.N...SAL...VP.GV..G..EA..SS...           | .....V             |
| pangolin         | .A...P.....D.....Y...ES...SAL...VP.GV.T...EA..SS...         | .....V             |
| mink             | .AQ..P....M....D.V.....Q.N...SAL...VP.GV..G..EA..SS...      | .V....V            |
| seal             | .A...P....PV.S.D.....E.N...SAL...VP.GV..G..EA..SS...        | .....V             |
| rhinoceros       | .A..TP.....S.D.V.....QE.N...TAL...P.G...G..EA..SS...        | TV.....            |
| horse            | .A...P.....D.....QE.N...TALV...P.G...G..EA..GS...           | .....              |
| porpoise         | .A...P.....S.D.....QE.N...SAL...VT.G...G..EA..SS...         | .....              |
| minke whale      | .A...P.....D.....QE.N...SAL...VP.G...G..EA..SS...           | .....              |
| cow              | .A..TP.....D.....QE.N...SAL...P.GV..G..EA..SS...            | T.....V            |
| pig              | .A...P.....D.V.....QE.N...SAL...VP.GV..G..EA..SS.T.         | .V....V            |
