# Supplementary material
Source: PubMed Central journal article supplement (PMC14566)
Supplement: pnas_250216797_5.pdf [file pnas_250216797_5.pdf]

|                |                                   |            |
|----------------|-----------------------------------|------------|
| Position nr:   | 1111111                           | 1          |
|                | 1122333333334445577888000001      | 150        |
|                | 26907480123457823859080470347891  | 054        |
|                |                                   |            |
| rat            | IRLALGQAS--SPSVAVGAVVVFVAVIEIVEIG | AAI        |
| guinea pig     | .....NPQ..AL...M.....I.L..A.V.    | ...        |
| armadillo      | V...I.SPQ..AL...LA.....PDV.       | ...        |
| Ind. elephant  | ..FS..NPQ..AL...MATI...TLL.LPD..  | <b>STL</b> |
| dugong         | ..FS..NPQ..AL...MA.I...TL...PD..  | <b>S..</b> |
| hyrax          | ...S..NPQ..AL...MATII.LLL.LPD..   | <b>STL</b> |
| aardvark       | .KFS..NPQ..AL.G.MATI...I.L.LPD..  | <b>STL</b> |
| elephant shrew | ..FS..NP.TVPIT.SMATI...T.LKLED..  | <b>STL</b> |
| golden mole    | ..FS..NPQ..AL...MATI...T.L.LPD..  | <b>STL</b> |
| rabbit         | ..F...NP...AL.T.M.....L..A.V.     | ...        |
| human          | ..F...NPQ..AL...M..I..V..L..AD..  | ...        |
| hedgehog       | ..FT..NPQ..AL...MAMI.I...L.VPS..  | ...        |
| mole           | ..F.I.NQQ...L...MA.I....L.VSDV.   | ...        |
| pangolin       | ..F...NPQ..AL...MA.I....L..PD..   | ...        |
| dog            | V.F...NPQ..AL...M.....L..PHV.     | ...        |
| horse          | .....NPQ..AM...MA.....L..PD.R     | ...        |
| fin whale      | ..F.I.NPQ..AL...MA.....L..PD..    | ...        |
| sperm whale    | ..F.I.NPQ..AL...MA.....L..PD..    | ...        |
| cow            | .....NPQ..AL...MA.....V.L..PA..   | ...        |
| pig            | ..F..RNPQ..AL...MA.I....L..PD..   | ...        |
