# Supplementary material
Source: PubMed Central journal article supplement (PMC14566)
Supplement: pnas_250216797_7.pdf [file pnas_250216797_7.pdf]

1111111

111111111122222233333344444455555566667777778888889999990001111  
 12345678901234567890124568124567901234567901245789178901346790156789013681367234

|                 |               |            |           |            |            |             |            |       |
|-----------------|---------------|------------|-----------|------------|------------|-------------|------------|-------|
| wombat          | KFTGLTQEELLTL | QMIKYQVEGN | GRVYIPGEV | VEKVGFEVND | VKMGTSQHST | GEVGI FVIHQ | GDNLLVVDST | EIQVL |
| opossum         | ANV           |            |           |            | NI         | A           | S          |       |
| 3-toed sloth    | XXNN          | DK         | R         | KD         | HSE        | A           | D          | L     |
| Af._elephant    | AP N          | E          | M         | SE         | TSMS       | K           | N          |       |
| dugong          | AP N          |            |           | SE         | TSMS       | K           | D          | N     |
| hyrax           | AP N          |            |           | SE         | TSMS       | K           |            | D     |
| aardvark        | TPAN          |            |           | SE         | RSMS       |             |            | S     |
| elephant shrew  | XP N          |            |           | SE         | ERSMS      | R           | D          | QIN   |
| mouse           | VL N          | R          |           | AQI        | RN         | RHE         |            | DL    |
| N.Am. porcupine | AP N          | S          |           | AG         | KS         | RHE         |            | DL    |
| rabbit          | APSN          |            |           | AW         | KS         | QHEI        | H          | DL    |
| galago          | TL N          |            |           | AW         | RGLR       | E           |            | MD    |
| human           | AL S          | SE         |           | AW         | RGLR       | H           |            | SV    |
| flying lemur    | A N           |            |           | AW         | KG         | HHE         |            | DL    |
| tree shrew      | A DS          |            |           | H          | EG         | RHE         |            | LDL   |
| hedgehog        | ALRN          |            |           | Q          | VQV        | KS          | HHEI       |       |
| shrew           | APSN          |            |           | SE         | RA         | R           | AA         | GRNL  |
| round eared bat | AL N          |            |           | AQ         | KG         | H           | DI         | S     |
| flying fox      | AL H          |            |           | AQ         | KG         | RHD         |            | D     |
| pangolin        | EL D          |            |           | AQ         | KG         | HHE         |            | N     |
| cat             | AL N          | K          | M         | AR         | KG         | RHE         |            | D     |
| fox             | AL N          | R          |           | AR         | KG         | RHE         |            | D     |
| tapir           | AL D          | P          |           | AR         | KD         | RHDI        |            | D     |
| horse           | AL N          |            |           | AR         | EG         | R           | DI         | D     |
| minke whale     | ALMN          | L          |           | IAG        | NGLR       | H           |            | D     |
| hippo           | ALKN          | L          |           | IAG        | NGLH       | H           |            | D     |
| cow             | AV N          | L          |           | IAG        | DGLR       | H           |            | I     |
| pig             | ALRN          | L          |           | IEG        | HNSLR      | H           |            | D     |

11111111111111111111111111111111111111111111111111111222222222222222222222222222222222222  
 1111222222333333444444555555666667778888899900000011111111222222233333334  
 56790124689013890156789135789024589025745789057134567891234568912356789123456890

|                 |                  |           |       |        |         |        |     |       |      |         |       |       |
|-----------------|------------------|-----------|-------|--------|---------|--------|-----|-------|------|---------|-------|-------|
| wombat          | GERGGEKVVTSHHVDI | AYKMRRAVQ | LGADR | XIGQDI | VSPSGSG | GCGIPA | EKA | EKALA | ITLR | RARGAIQ | RMEVL | QNYTL |
| opossum         |                  | M         |       | G      |         | K      |     | G     |      | Q       | G     |       |
| 3-toed sloth    | R                |           | A     |        | G       | V      | R   |       | A    | V       |       | QKM   |
| Af. elephant    |                  |           | SAD   |        | G       | R      | V   | Q     | G    | RE      | QK    | H     |
| dugong          |                  |           | SPN   |        | G       | R      | V   | Q     | G    | KEA     | HQK   | H     |
| hyrax           |                  |           | SAD   |        | MG      | R      | V   | Q     | G    | RE      | QK    | H     |
| aardvark        |                  |           | SAD   |        | L       | G      | R   | I     | Q    | G       | RE    | QK    |
| elephant shrew  |                  |           | SA    |        | G       | Q      | R   | V     | Q    | G       | RG    | VS    |
| mouse           |                  |           | SAD   |        | G       | G      | Q   |       |      | RE      | QK    | NL    |
| N.Am. porcupine |                  |           | ST    |        | SRG     | Q      | P   | Q     | G    | RE      | QK    | NL    |
| rabbit          |                  |           | SAD   |        | GRG     | Q      |     | L     | V    | QK      | L     | G     |
| galago          |                  |           | AD    |        | GRG     | Q      |     | RV    | R    | QK      | NL    | G     |
| human           |                  |           | AD    |        | SQR     | HQ     |     | RG    |      | K       | E     | F     |
| flying lemur    |                  |           | SAN   |        | SRR     | Q      |     | RV    | QK   | F       | G     | G     |
| tree shrew      |                  |           | SAN   |        | S       | G      | Q   |       | RV   | QK      | F     | G     |
| hedgehog        |                  |           | SAD   |        | S       | G      | Q   |       | RV   | QK      | F     | G     |
| shrew           |                  |           | AD    |        | I       | D      | G   | T     | Q    | V       | A     | QK    |
| round eared bat |                  |           | SAD   |        | G       | G      | QI  |       | RM   | QK      | H     | L     |
| flying fox      |                  |           | SAD   |        | G       | G      | Q   |       | RV   | QK      | L     | G     |
| pangolin        |                  |           | GSPD  |        | SRG     | T      | Q   |       | RV   | QK      | L     | G     |
| cat             |                  |           | SAD   |        | S       | G      | T   | Q     |      | RV      | QK    | L     |
| fox             |                  |           | SAD   |        | G       | G      | VT  | Q     |      | RV      | QK    | L     |
| tapir           | ED               |           | SADR  |        | G       | G      | Q   |       | RV   | QK      | L     | G     |
| horse           |                  |           | SADR  |        | G       | G      | Q   |       | RV   | QK      | L     | G     |
| minke whale     |                  |           | N     |        | AD      |        | GRG | Q     | P    | RV      | G     | QK    |
| hippo           |                  |           | NSAD  |        | SRGN    | Q      |     | RA    | QK   | L       | G     | GE    |
| cow             |                  |           | KSAD  |        | SRG     | Q      |     | RV    | NQKV | L       | G     | GE    |
| pig             | D                |           | SAD   |        | S       | G      | Q   |       | RV   | QK      | L     | G     |
