# Supplementary material
Source: PubMed Central journal article supplement (PMC14566)

# A. (CRYAA, ML tree)

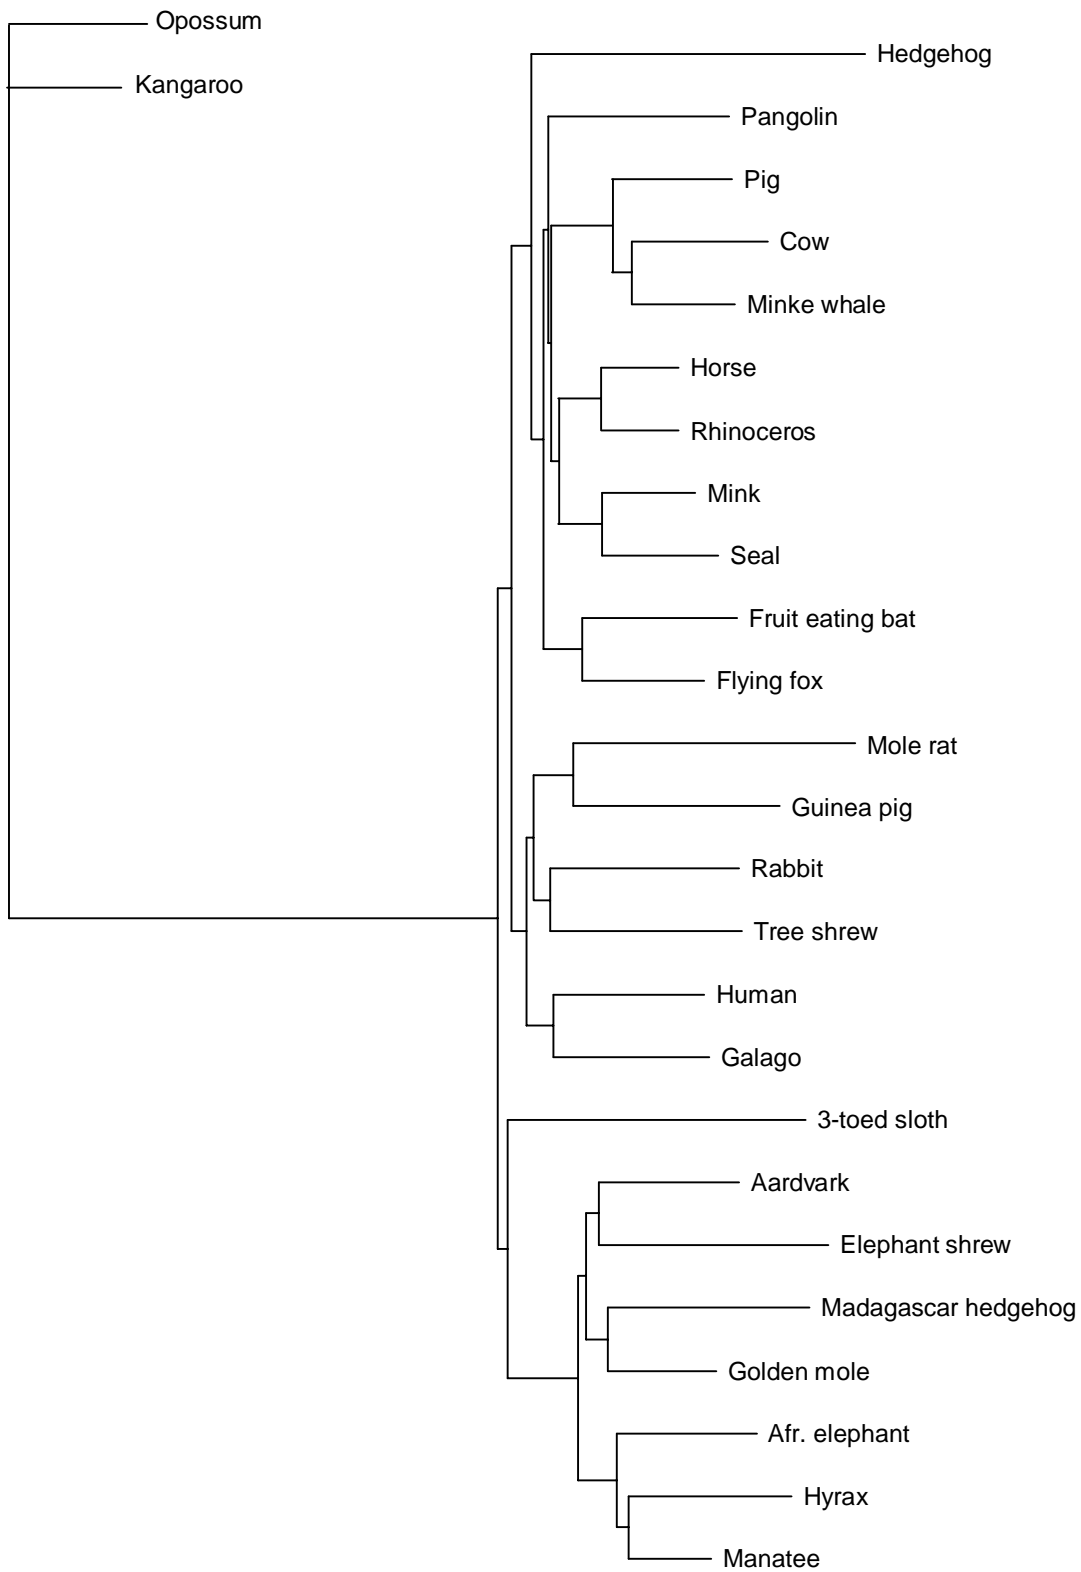

0.1

## B. (CRYAA, Afrosoricida with hedgehog)

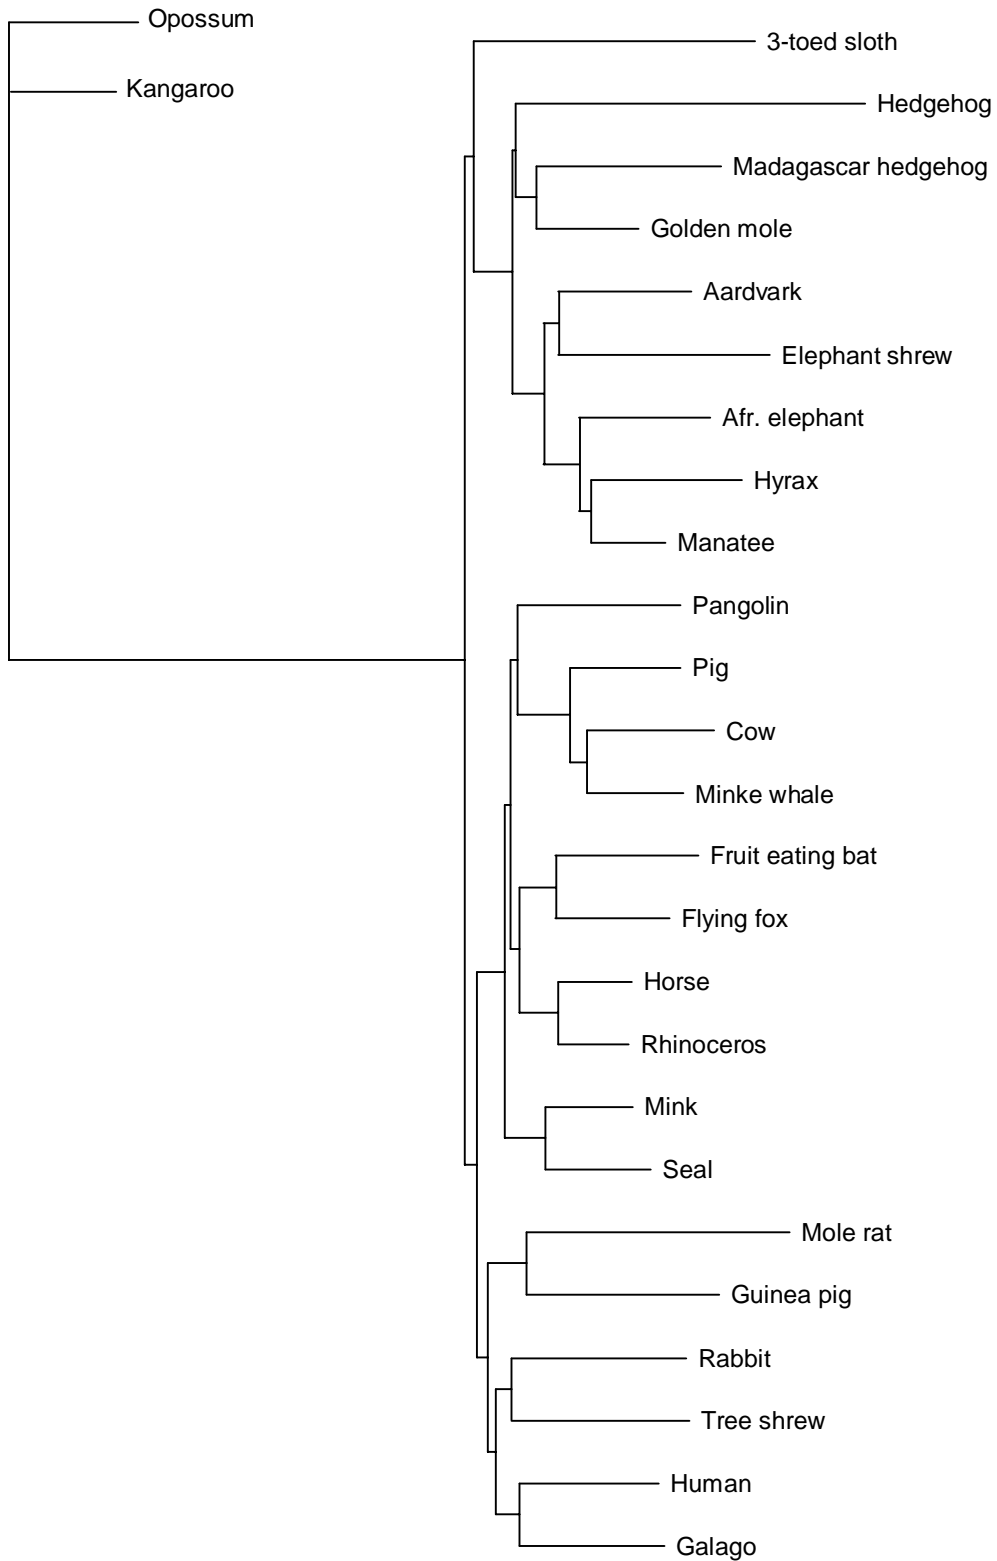

0.1

### C. (CRYAA, Elephant shrew with Glires)

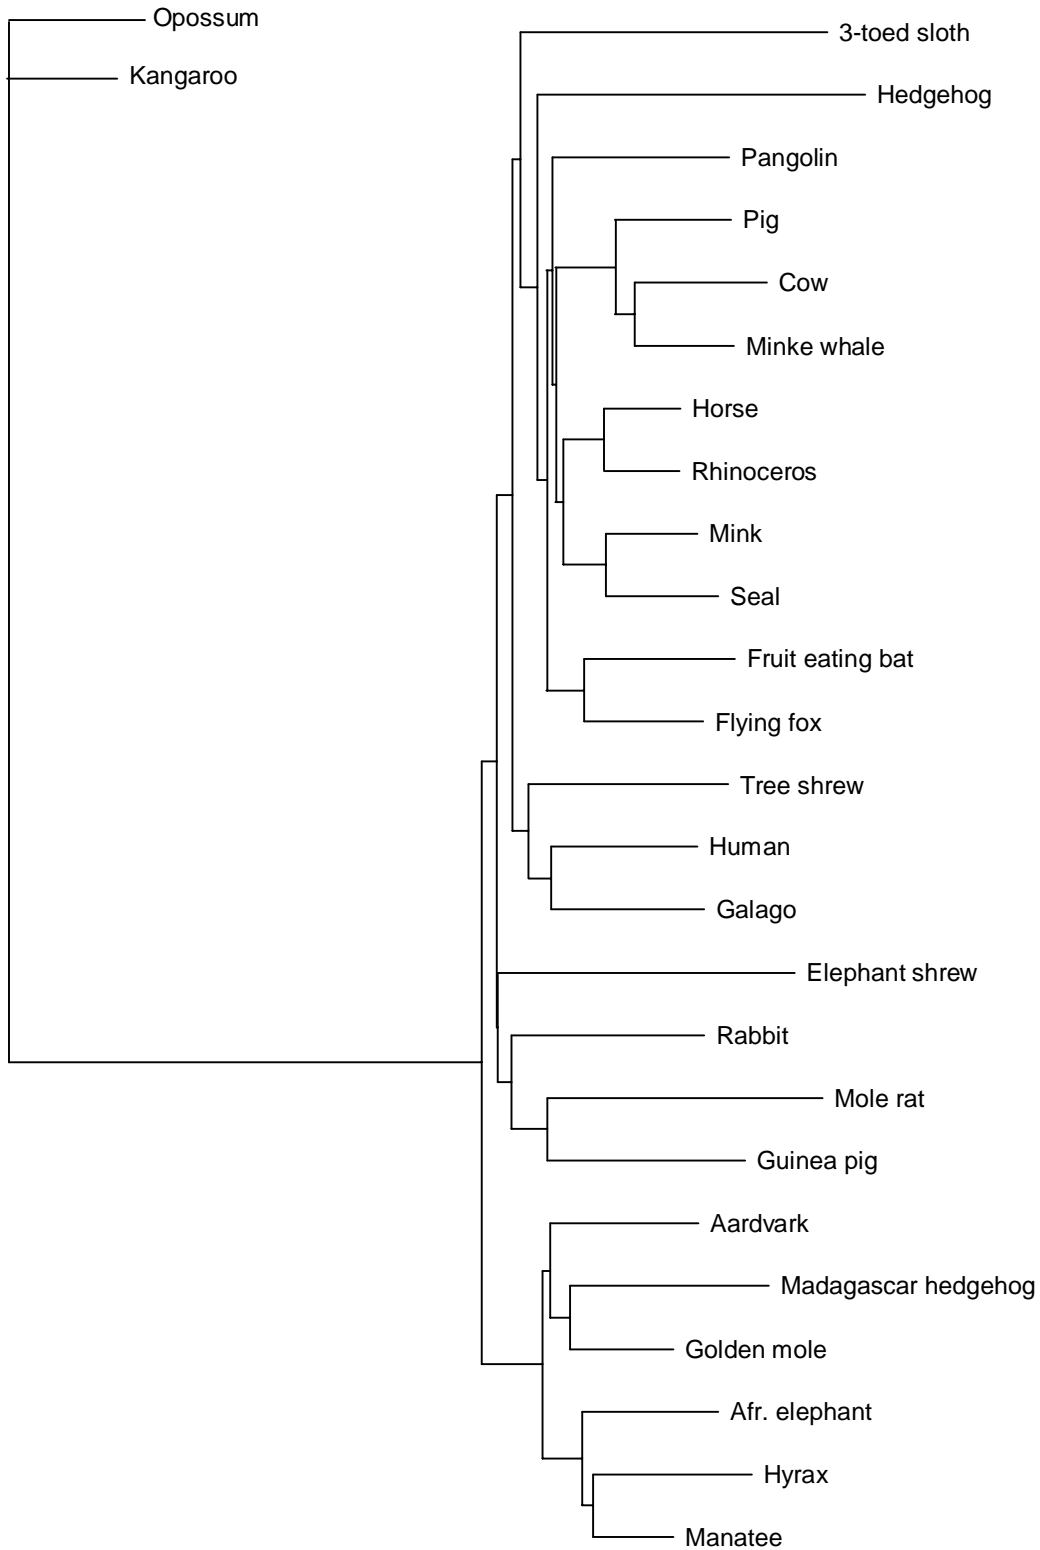

### D. (CRYAA, Novacek tree)

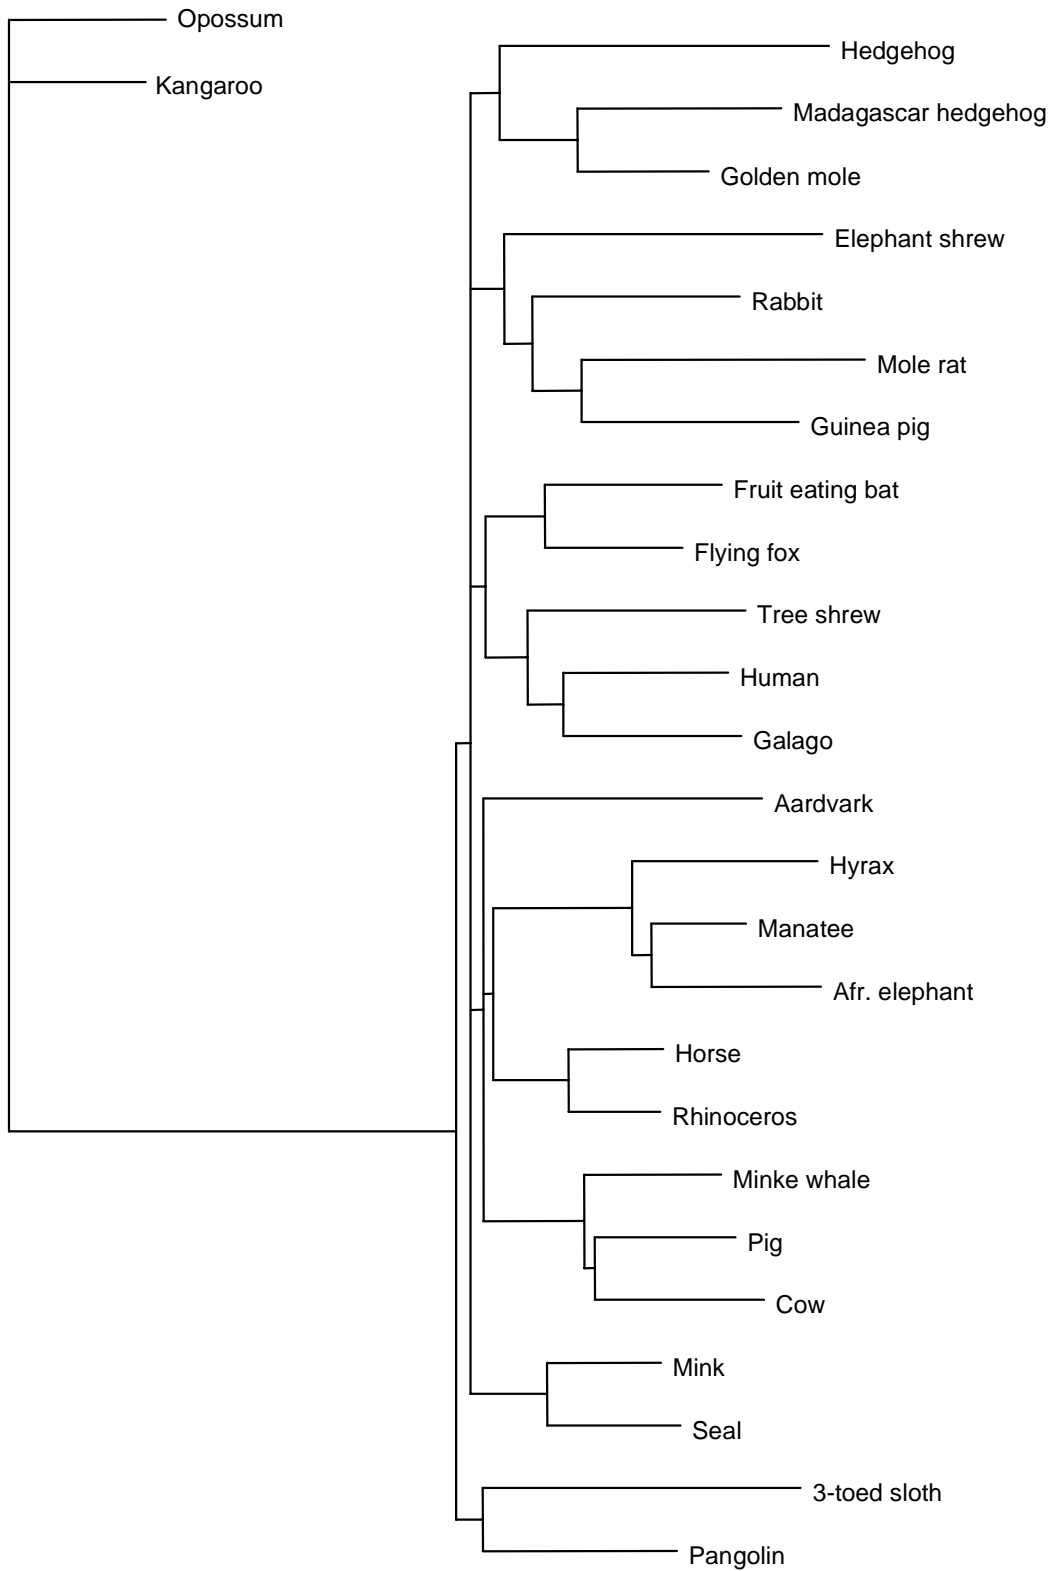

# E. (AQP2, M1 tree)

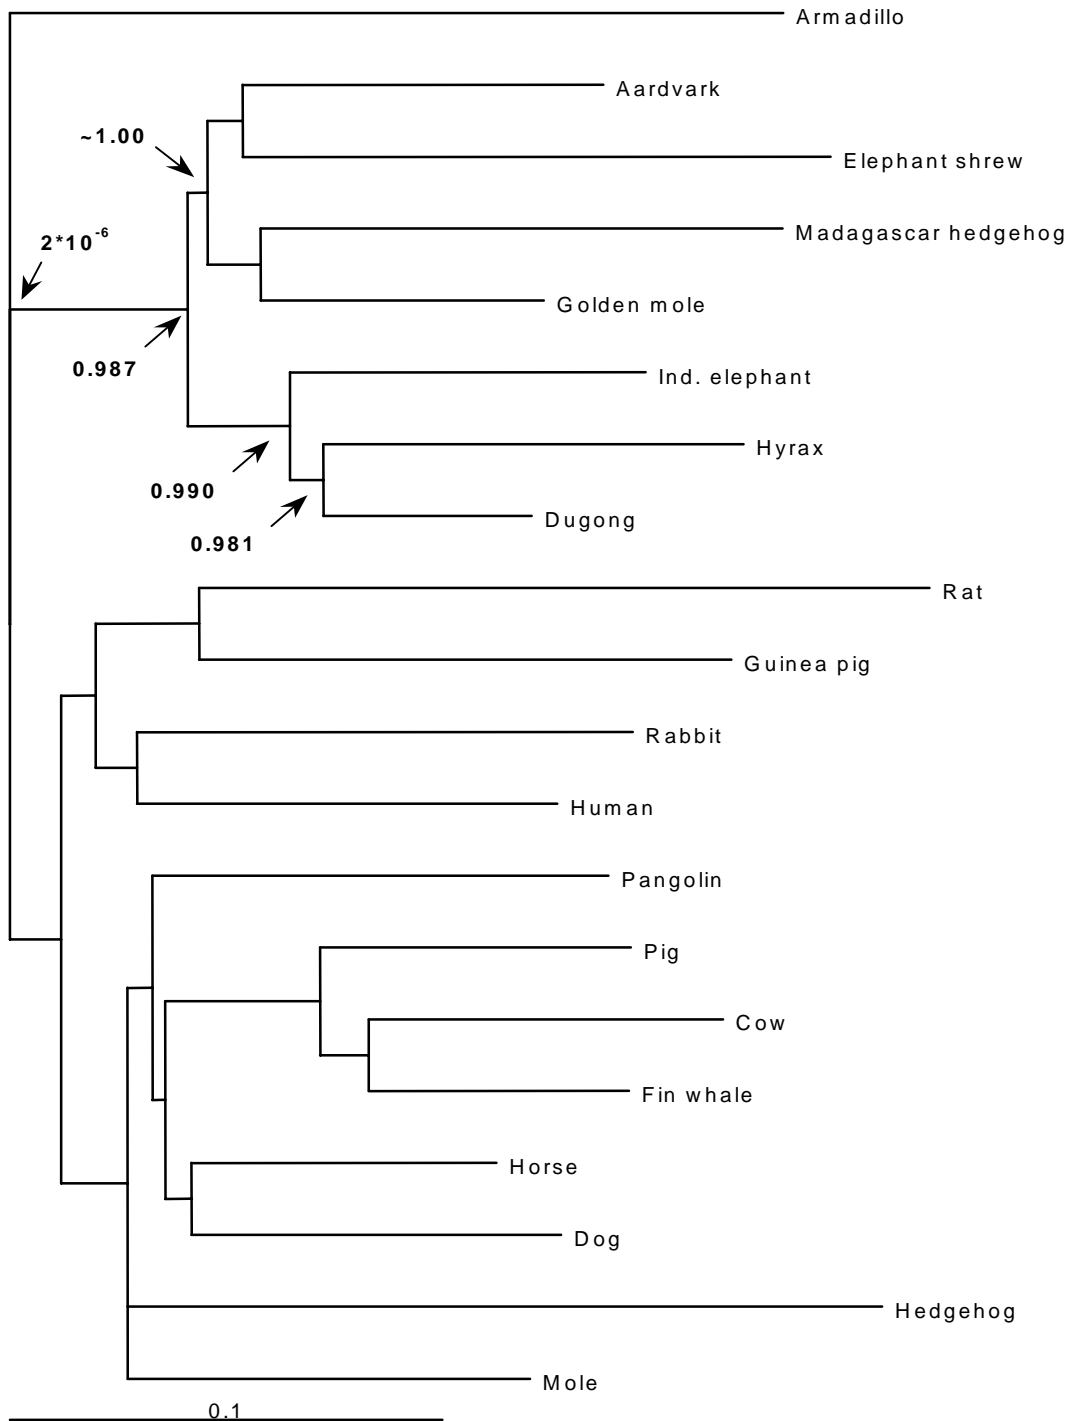

## F. (APQ2, Afrosoricida with hedgehog)

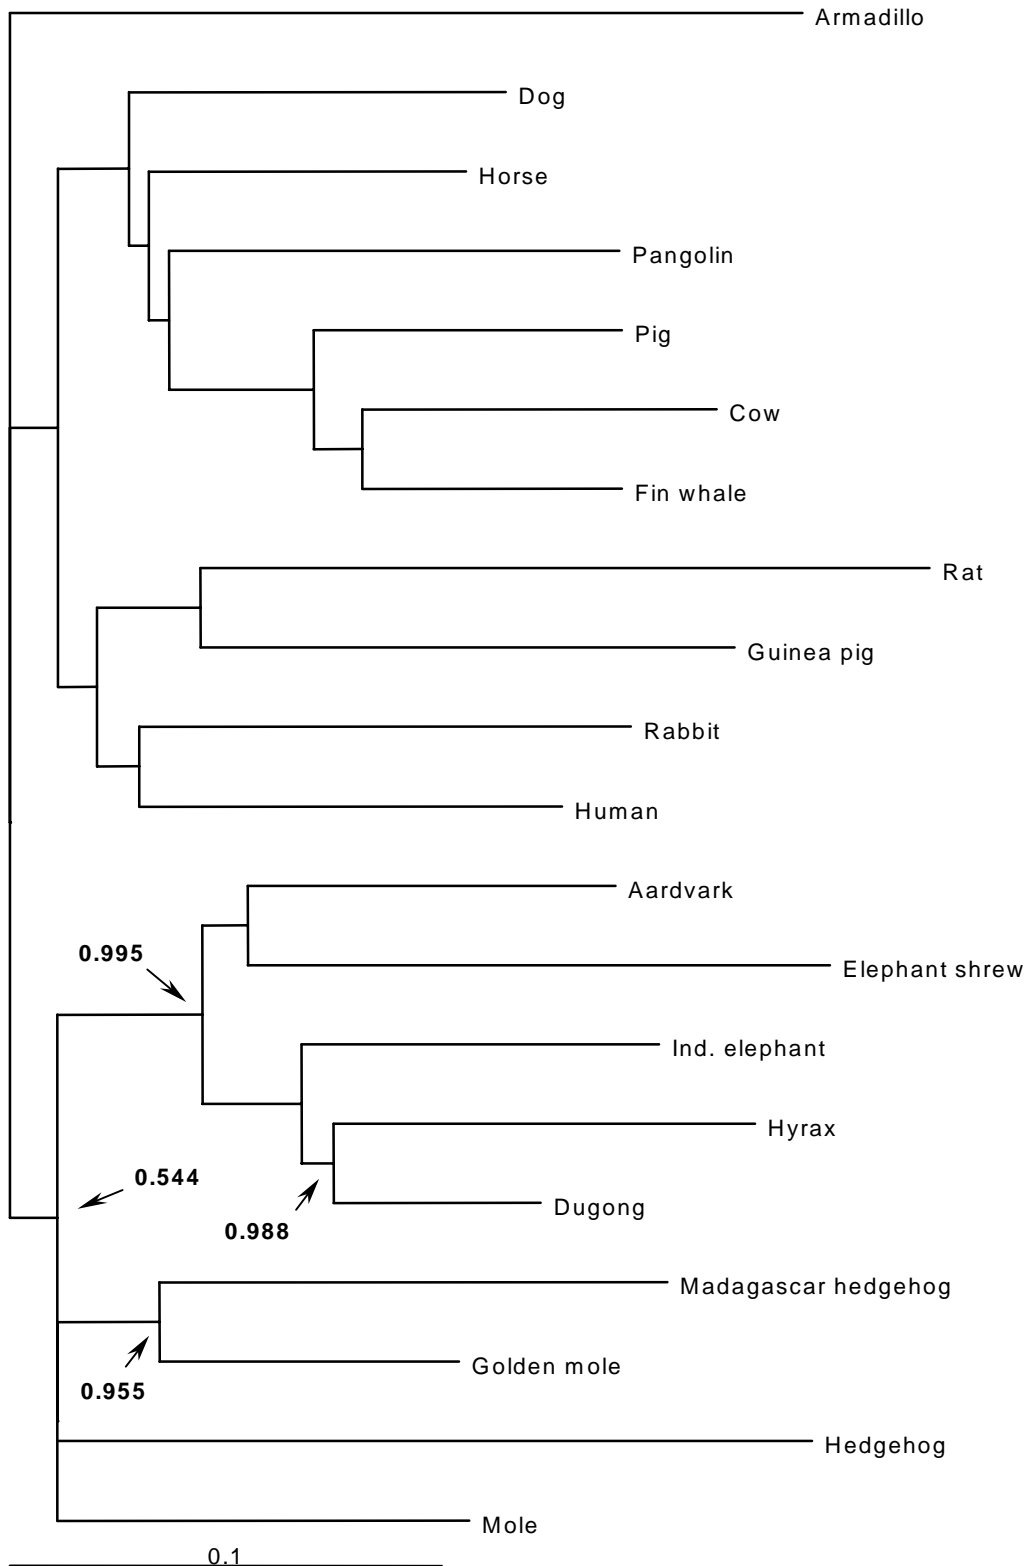

### G. (AQP2, Elephant shrew with Glires)

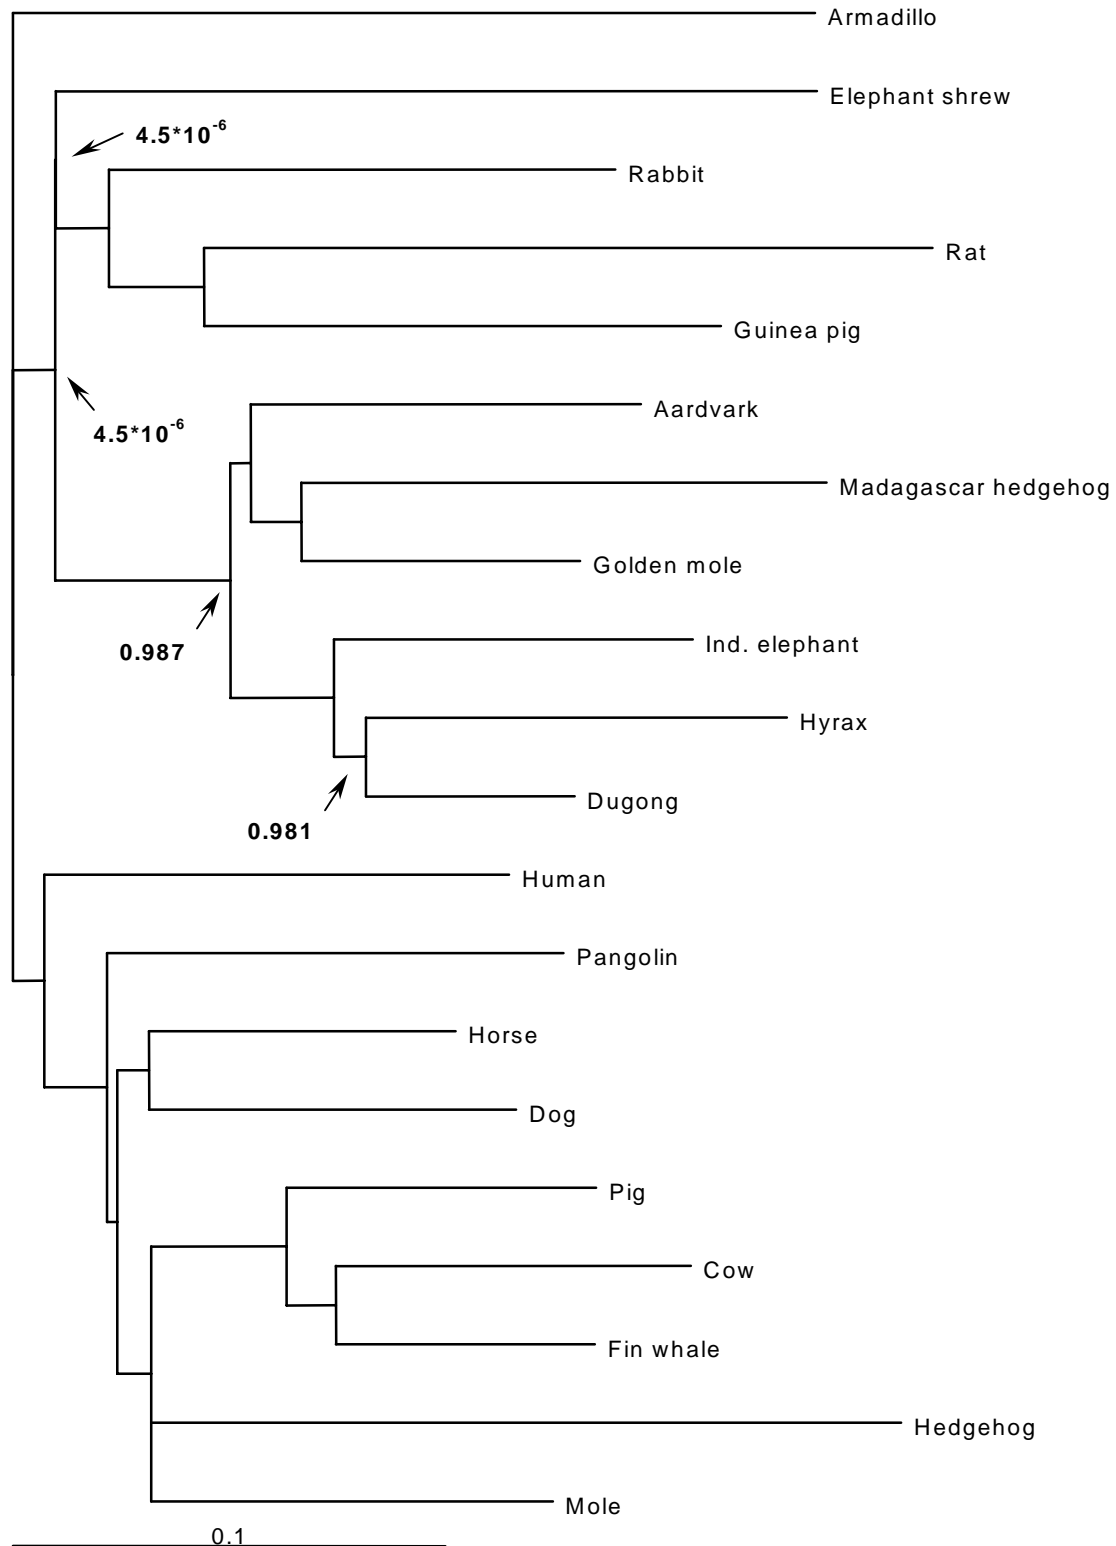

# H. (AQP2, Novacek tree)

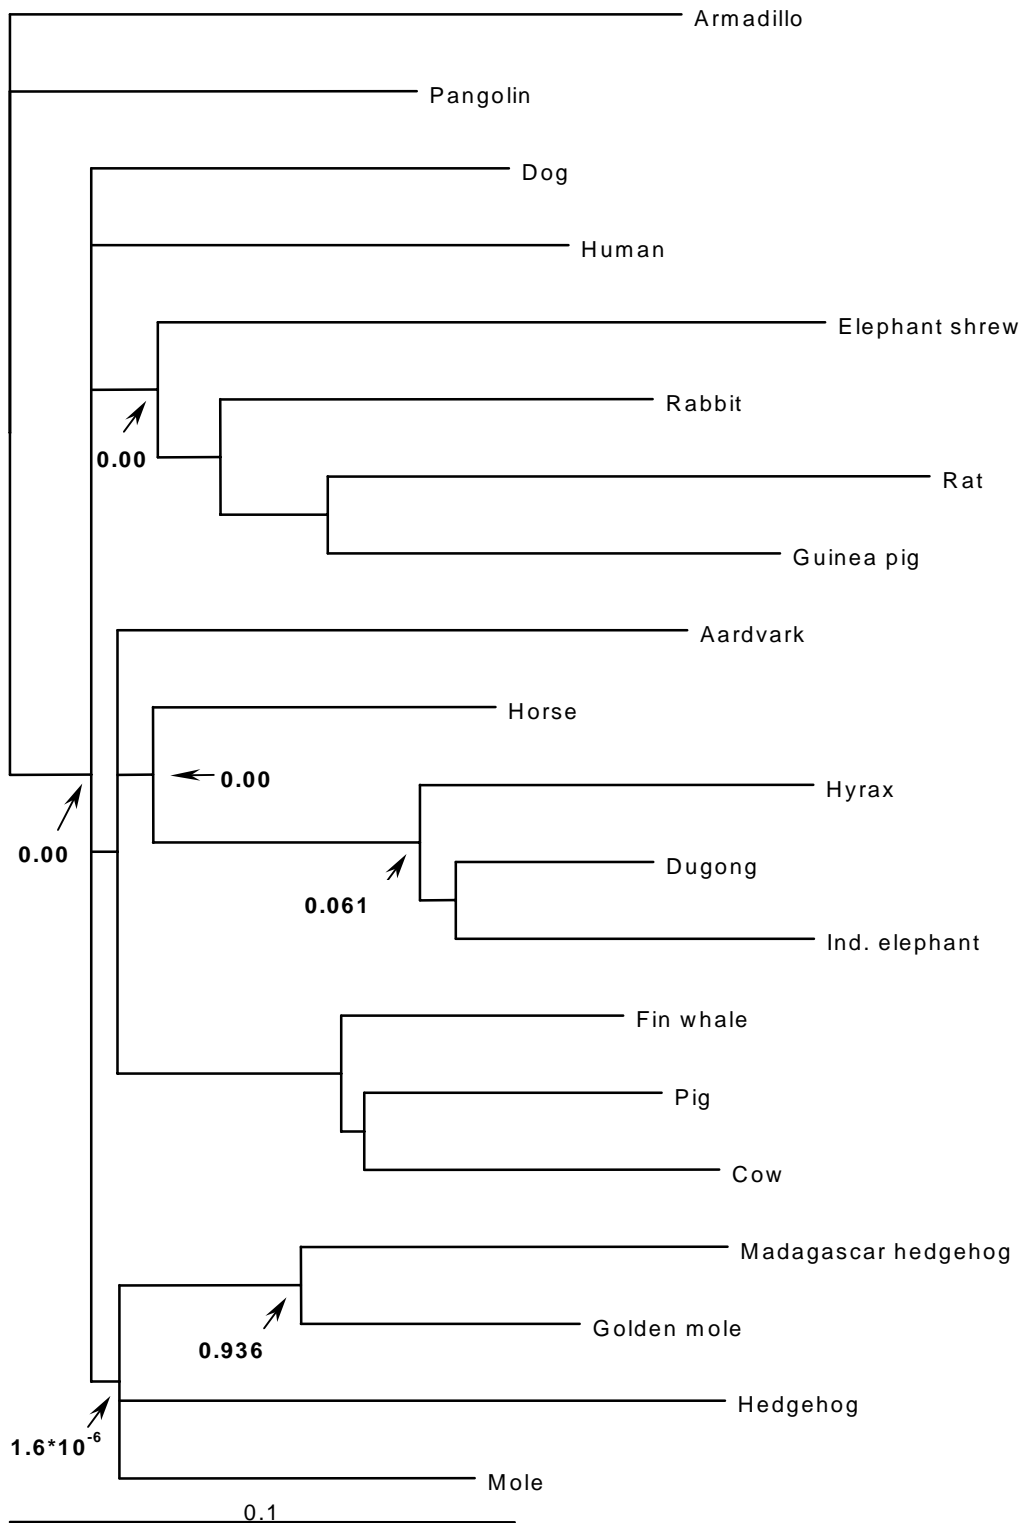



# I. (IRBP, ML tree)

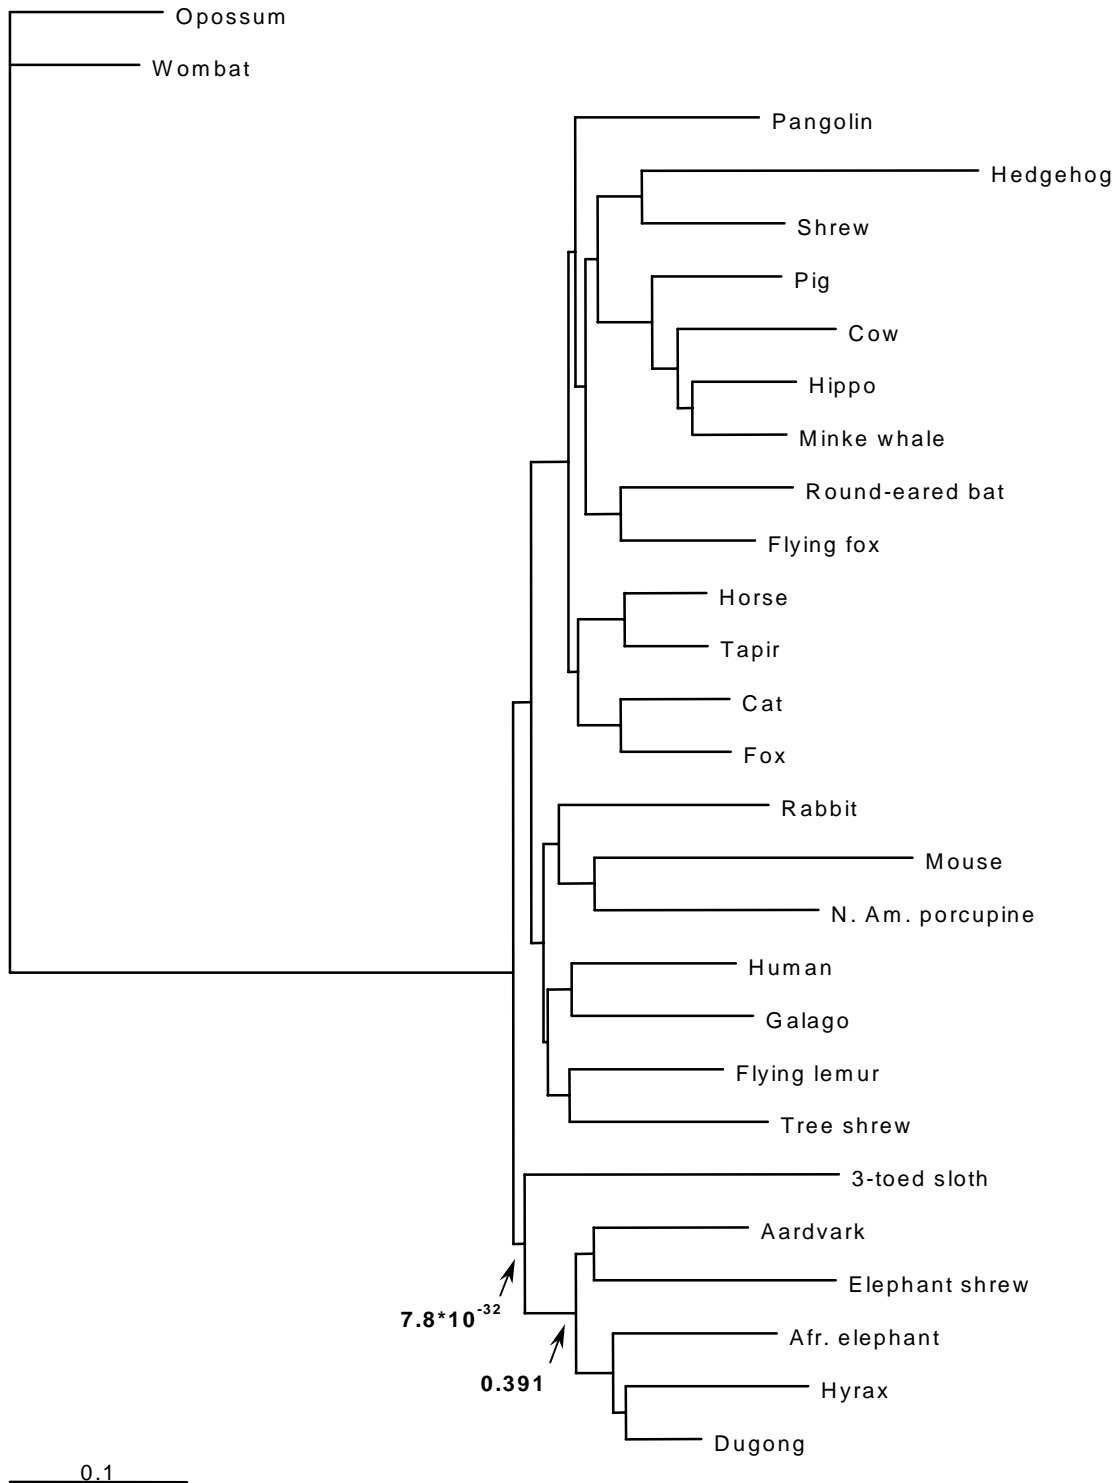

# J. (IRBP, Elephant shrew with Glires)

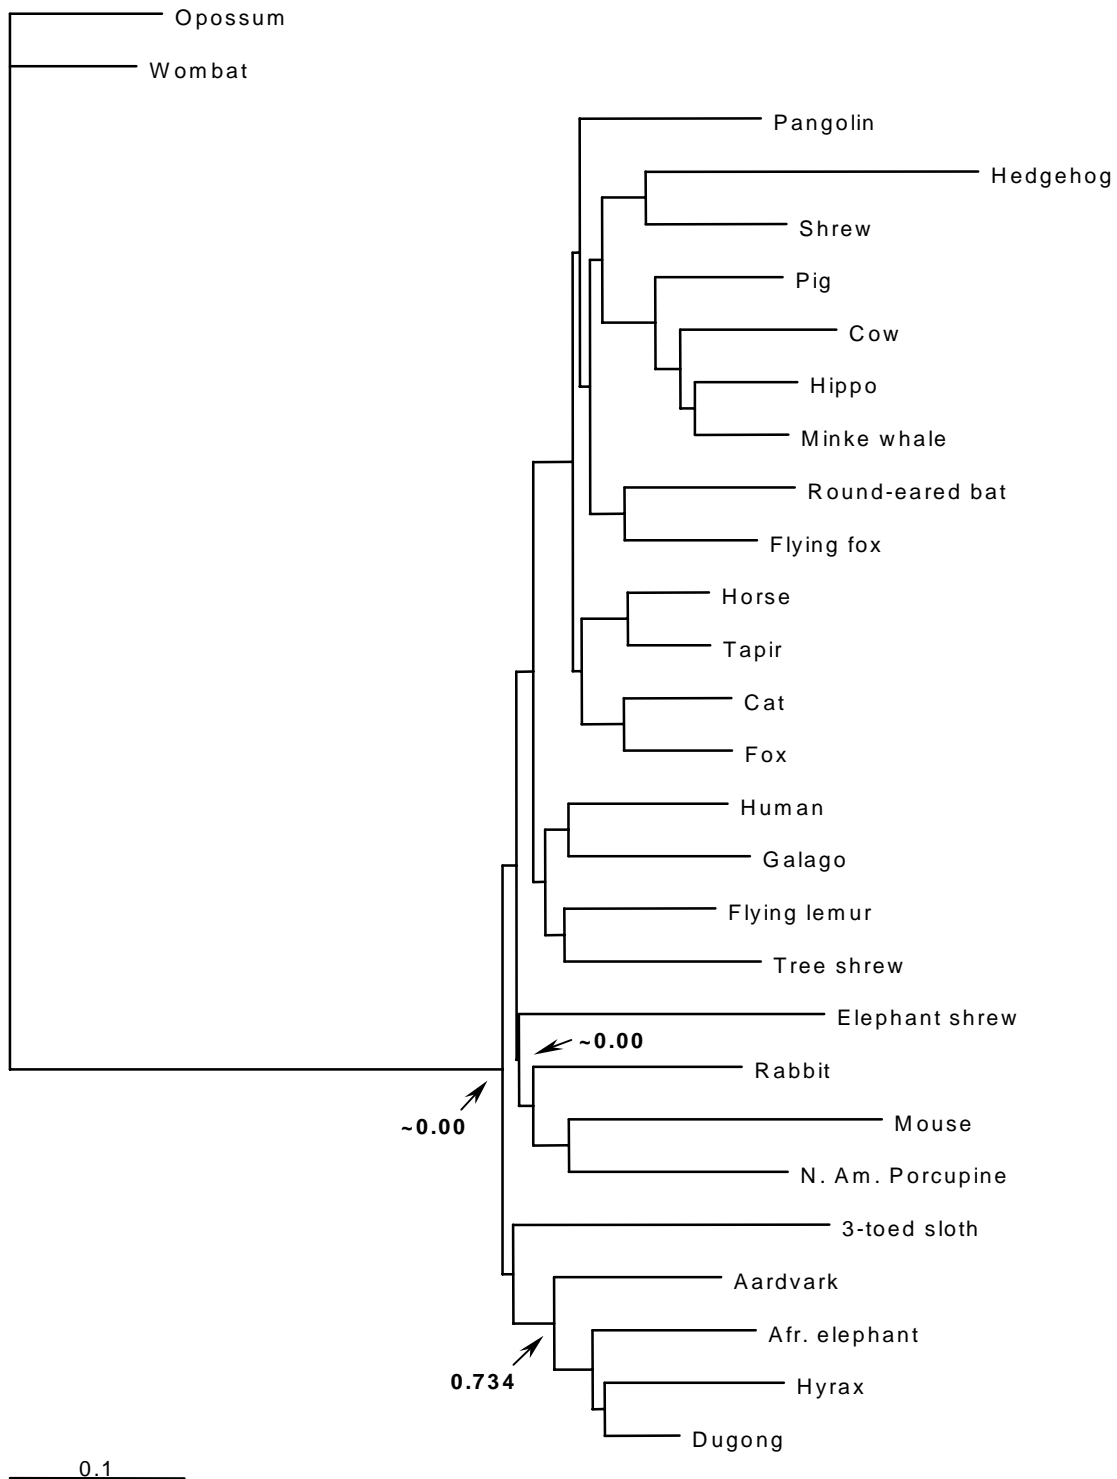

# K. (IRBP, Novacek tree)

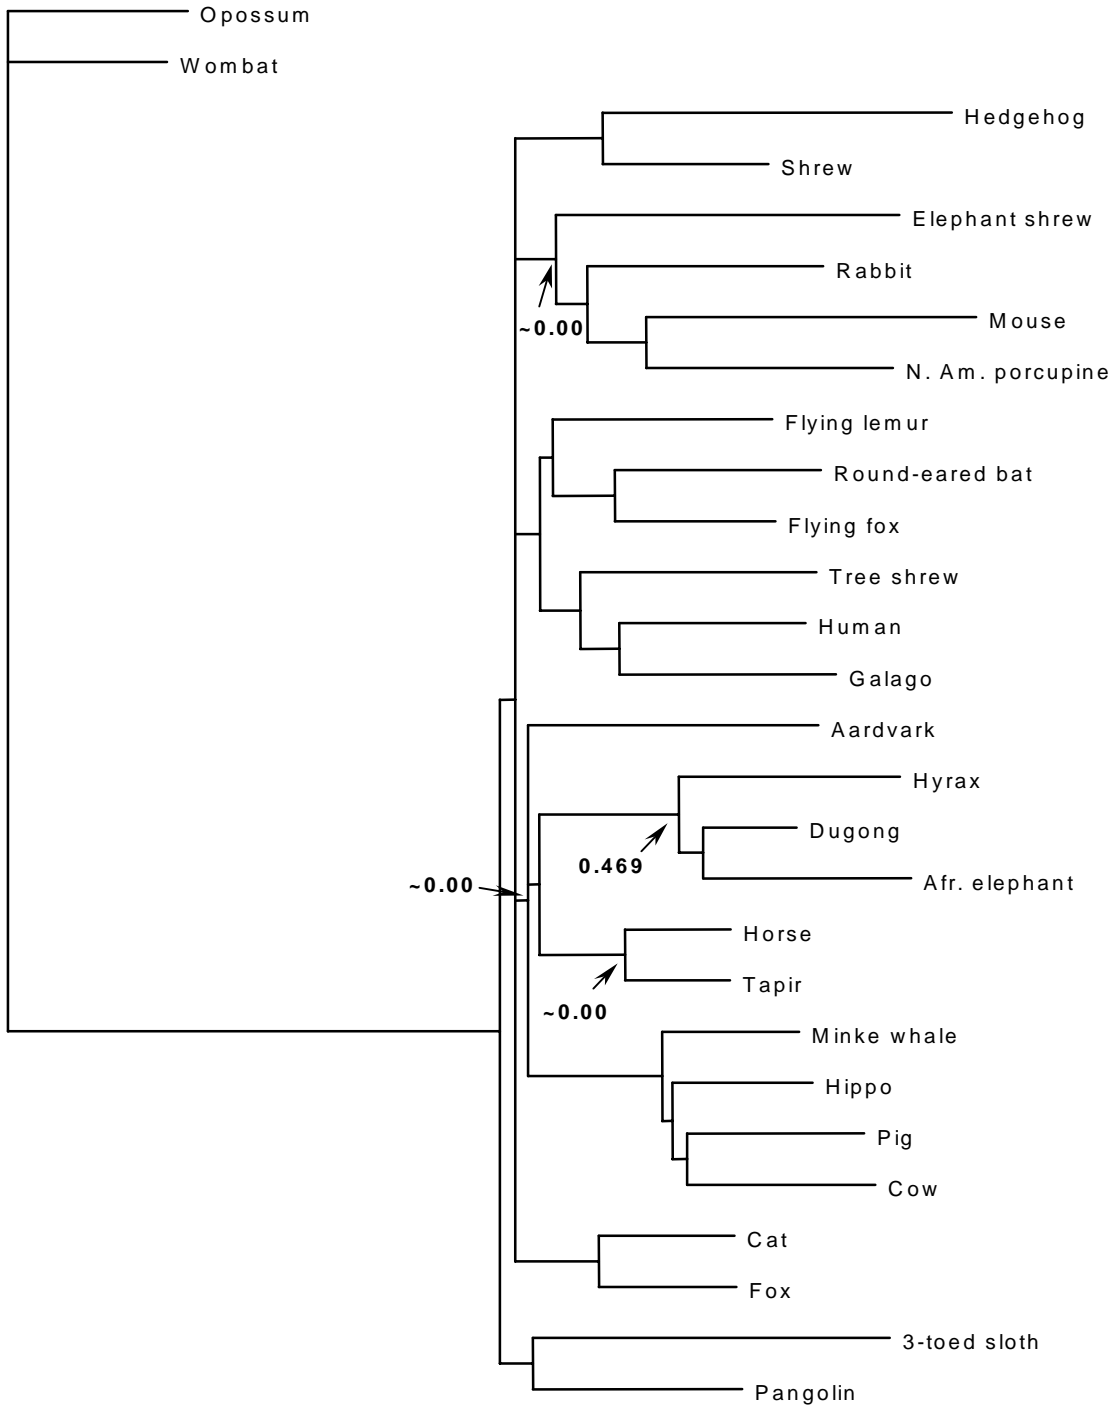

Supplement: pnas_250216797_10.pdf [file pnas_250216797_10.pdf]
